# Supplementary material
Source: PubMed Central journal article supplement (PMC5629337)
Supplement: 755FigureS1.pdf [file 755FigureS1.pdf]

**Figure S1.** TB1 binds to DNA with a GGNCCC motif. Binding site selection was performed to determine the TB1 consensus binding site. TB1 protein was incubated with 32P labeled DNA fragments that contain 25 randomized nucleotides and then subjected to gel for Electrophoretic Mobility Shift Assay (EMSA). TB1 binding motif was obtained from the consensus of the shifted DNA fragments.

```

TCTTACGGGGCCCCCCTTTAGAATCTC
CGCTGTGTGGGGCCCCCTCAAACACAA
GCTATGTGGGGCCCATGCTCAAGATT
CTCACCAGCCGGGGCCCGGACATACTCA
TATTTATCCTGGGGCCCTACTGTG
CGCCCCCATGGGGCCCATCCGTG
TCGACTGGGTGGGGCCACACCGACGT
ACATGGGGGCCCAATCCGACATACCT
CTCACCAGCCGGGGCCCGGACATACTCA
TTGCTGTGGGGCCCATGCTGCACAA
TTTATCGAAGGGGGCCAGTATTATCG
CTGTGGGGCCCATGCTGCACAACACT
GTGTGTGGGGCCAAAAGTGAAGTGA
CAGACCAGCCGGGGCCCGACCAGCCGG
TGCTTATAGTGGGGCCCCCTGATCTAAAT
TGCATGTAACGGGGCCCCAATTAGA
CTTAGACCGGGGGCCCGTAACTGGCA
CTACTCATGGGGCCCGCTAGTGCA
TCGGCATTAGGGGGCCAGTCCCTGTCA
CCTGTCCAGGGGGCCCGGATTAGTA
GAAATTGGACGGGGCCCTTTAACAAAT
CCGAGTGGTGGGGCCCACTCTAGGCT
GACAGTGTGTGGGGCCAAAAGTGAAG
CCACTACATGGGGACCGCATCTGTTC
CGTCACTGGGGGGTCCAACCTCGT
CAACGTGAATGGGTCCACCTCGATTCA
TGTTTATGCCGGGTCCCTTTGATACCCA
GTACTGGGGCCATCCACCCTATTTTA
TTATCCTGTGGGACCAACCGATT
TTCTGCGCCGGGACCAACACACG
GCGTAAGCCGGGACCCCGTGAGC
CATGCTAGGGGGACCCACTAGTACTTA
CGTATTGTAGGACCCCTAGGCCGGTCC
GGTAGTTATTGGACCCGATCATAGGC
GGTTGAGCCCGGACCCGTTAAGAGAA
ATCGTCTCTGGGACCCGCTCTAAAGA
TCCTCCCCGGGGACCCCGAGACATAA
TGCTAGGGGGACCCACTAGTACCCA
GCTAGGGGGACCCACTAGTACCCATG
CATGCTAGGGGGACCCACTAGTAC
GAACAGATGCGGTCCCCATGTAGTGG
CTCTGCCTGGGGTCCCATGATTTCCA
CCGATGAGGGTCCCCTCGCCAGTAACC
GGTAAGAGTAGGTCCCACCACTCAGC
GGGTACACGGGGTCCCACATTTTAA
GTAACAAGGTCCCTGGAGTCA
CTCTCGTACAGGCCCCACAA

```

---

**GGNCCC**
