# Supplementary material
Source: PubMed Central journal article supplement (PMC5629337)
Supplement: 755FileS1.pdf [file 755FileS1.pdf]

Expected: 4 GTAC per 1,000bp  
Expected: 1 GGNCC per 1,000bp

>PCNA2\_GRMZM2G108712

TTTCGGTTTTTGTATCTAAGAAGTTCGGTTTTTCGGTATCGTAATCGGTTTTTCACCGTAT  
ACCGAACCGAAAAACCGAATACCAAACCTTATCAATTCTCAAATTTGACTATTCGATT  
ATGTGAACTAATTGTGTGATACAATTAATTGTTATTCACCTATTTGTATGTGATGTAT  
GATGTATATCTAAATATTTGTACCTATATAATTTTTACTTTTTAAAATTATATGTAATC  
TATCATGTAACTTGTGTATGTATTGTCTTGATTATAAGTTTGGTATTCGGTTTTTAC  
CGAAAAATCGAAGTAAAAACCGAAACCGAACTTCTCGGTTTTTCATTTCTAGAAAAC  
CGAACGGTTTTCTAATGTTTAAAAACCGAAGTTTTTTAAAACCGAAAAACCGAACCGAA  
GTTTAGAAAAAACCGAATGCCAGCCCTAAAAATTAGTACCCATAAGAACTAAAAAA  
AGATAAAATGACTAAAAATTAATCAGTTGAAACCAAACCTATTTTCCCCACACCTCAC  
GGTATTGTTTTCGCATTCCAAGTTTGAACACGACTGGAAACAAAACCCAAAACGACTGG  
AGGGACCGAGCTTGTGCTGAGCAGCAGAGATGGCGGGAAATGCTGCGTCTCCCGCCTCA  
GTTTCGGATGCCCGCCCTTTCCCAAACCGGCCACCGCCGCGCCCGTGTCTCCCCACC  
GACAGGTGGGTCCAATCCTTAACCACGACCAGGGCCCCCACCTGTCAGGTGGACCTTC  
CGAAGCAAGGATCGGCCAGGCGGGAAAAACATTTTCGCGGCAGGTGGCGGTTGCGCCAAAT  
TTCTCCCTCCCTTTTCCGTTTCGGCGTCCCCAAACGCCTCCCTATTAATCTCCCCGCGTT  
CCCCTTCCCTCGCGCCGCGCTCCCCCTCCCAAAGCTCGCCCCGCTCCCAGCTAGGGT  
TTCTCTTCCCATCCACAGCCGCGGGGCGCCGCGGACGAGGACAGCGCCGCCACGatg

>Tga1\_GRMZM2G101511

CATTCGCAAACGATTGGGGAGACACTACGTCGCTCAAATATGTGGGGGTGGGGGGGGG  
GGATAGGTTGAAAGCGGGTTACCGTATTTTTCCAACAATGATGGATCCGTCGGGCTGAT  
TTGGTGACAAGGGGATCCCGGAAGGATTGAAGAGAATTGAGGGGAAAAATGAACTAATTT  
CCCTCTCCATTATCTCGGGATCCAGGGTCACCAAATCAACTCTAAATCTGTTTTTTCGGG  
TTGTTTTAAGTGCTTTTGGAGTTACTCTTATACGAATTTGAGTCATTTTTTTTTAAAAA  
AAAGATAAATCAAATATACATTAGTCTGTACATAGAGTACTGCTCTGAAAAAATAA  
AAAACTGTAGAGACACCTTAGCCCCAATAATTGTAGCACAGGCAACAGGTGCACAGCA  
CAACATAGCCCCATTGCATGCATGGCTGCAGTGTGACACATGGCGGTGGGGCCCTGCC  
ACTGTTCTCCTTCAGGGACGGAAAGGTTGGTTGCGGCCCCACCATGGCGCCAAGTAAT  
ATCGCCGCTGCTCTCTCTCTCTTTTTCATGCACACGCTCCTCTCTCCCTCCCTCCAC  
CATTGCTACAGTCGCAGCTGTCTGTGTCTGCAAAGTACTGACTGCTCCCACTCCACTCC  
ACCCCAGTTCCGGGCCACTCGGGCATCGTTTCTGTTGCTGCAAATCTTTGTTGGCTGC  
TGCTGCCTTGCTATCTATCTATAACCGCCCGCACCTTCCATTCTCTCCTCCGAAGC  
AGCAGGCAGCAGCTGCATCGCACCTCACACCTCTCGTGTCCATCGATCCAGCCGCCGCC  
GCAGCTGCAGCTCTCACTTCACTGTTGCTGTGCCACCTCCTCGTCGCTGTAGTGTCTG  
TCGATAGATAAACGCCCGCGGAATGAGAGGGAAGGAGCGGAAGCTGCAGCGGGCGCGCG  
CGTGCAAGGGCTAGGACTAGCGGTTGCAACGTTCGGCGCGCGCGGCGTACGTTCGGGCatg

>ZAG1\_GRMZM2G052890

TTTGACATTGACCAAACATATACAAAACATTATTAATATTTCTGATAAATAATAAGTAT  
CGTTGCATTAATAGTTACTTATTTGAATATGTAACATTACCAATATTTTTTTGAACTT  
CACCAAACAAGTTACAGCCACCAAATAAGTTGCTTTGTACCAAAAAAGTTGCAGCCGCC  
AGACTTAACACTGCACACCATCAAATCAACGTTTCAGACCGTTAGATAACCAATATCC

TTTACTCATTCAAATTCAATAGACAATACTATTTGGATTATCTCTCTCCCTCACGTCT  
CGGCGCCCCTCTCCCTCACTCGCACCACCGTTGTCGCCGTCGGCACCACCGTCAACCC  
TTCCCTCGCACCGCCACCGGTATTGTCGACCTCTTCCCTCATCTCTACGGGATCATAGC  
GTTAGCACAAACTATATGCTAGTAGATTTAATGATCTAGTGTAGTCAAATTA  
TTAGTGTAGTACTTTGGTAACCAATAGCCTCCTTTTCTAGTATCTGTACTTCCCTAGAG  
CCTAGACAAGGTGCAAGAGGAAACCAATAAACGACTCCCAAATTTTTCCAAAAGGTTTG  
CACAGCTCCCAAGTAAAAGCTCAGTTTTAGTACCGTGCAAGTTCACGTAGGAATTTA  
ACAGCAAATTTTTTTTGGATTCTTTAACAACAAATAAATAATAAAATTAGTCCATCTAG  
ACCCTGTACAGTTCCCACACGTTTCAAACGGACGAAATTAATAATTACCTAAAAATGTG  
CAGGTCGTAGCAAAGTATAATTAATTAATACGAAAGAATAGGCACGGAAATGCCGTA  
CAAAGATATAAAAAAGGGTAGAGGGGAATGGAAGAGTCCAGGAGCAAGAAACACTCAG  
AAGCTGCCCAGAGCTACCACCCTTCTTATCCCCACCCCTCCTCCTCCTACCTTTTCTCC  
TTCAGACCTCAAATCTGTGTGTCTCCTGCCGCGGTAGCTGATAGGAACAAGAGC

>ZAG2\_GRMZM2G160687

CTGCCGTGCCAGCTTCTTCTTGCTACTTGGATGATGATTCTTATTTGCTTACTTGATTT  
CGTTTTTTTTTCTTTGCTTTCTATATGTATCTGGGCTGTACTTCCCTGCGCATCTCGT  
TACTACGTACTAAGCTTTGGAAGGTTTCAACTCTTTGTATAACGATGAGGTTTCTGCC  
TAGTAGCAGATCCGCGCACGACTAGATGTTTGAGGAAAAGAAAAGGGCAAGACGCTATA  
TATATATGCAGCAGCAGTCGCACATATATCCAGTTTCCAATCTGCCCTTTGCTTTAT  
GATAATCAACTTGCCTGATTATATTCTTGGCTACCTAGCTAGAAATGTCTAATTAAA  
CTTTGTTTGTAGCTAGATTTTGTGGTCTTTTTCGCATCTGATCTTTTATACTCTTA  
CTGAGTGTCCGCAAAGCCTTCCAGTGTGAAGAAGCTGCTGGAAGAAGAGATGAGCTT  
TCTCTTGAAGGAAAAGAGATGATCATTGCTGGTTTGTGTTGTTTCTGTTTTTTT  
CTTCTTGTCCCCATTTATATTTTCGCGCCTAATGAACGAGCCCCTAGATCTTGTGTTCT  
TGTGGCTGGTTTTGTTGGATCTCGAATCTCGGTTACGTTTACATGAGTCTTGCTGCCTA  
ACATACATCTGTGTTCTTTTCTAGGCTGAGAGAACTTAACTGATCGAGTCTGTCTGG  
CAGGCATCGATCTATCCAGTCGTGAGTTCGTACATCCGCTTTTTCGTATATATCATCT  
TCAGATTTTGTCCATCTGTCAAATCATGGAATACTGTGCTCTTTGCTTGTATTCTCTT  
CTGTTATTCTGCTGCCTCCGGCGGACCAATTTCTGAACTCGACCCGTGTTCTTATTC  
CTTTTGTAGACAGCCAAATCGCTTGTCTGATCGTAGTGTACTGTACTGCGGCTA  
GCTAGATCTTCCAAGCTAGCTATAGTTTCGCCGTCCTTTGATCTGCTTCACAGAACAT  
ATATAACACTTGAACTCTTTTACGCTTATGAGAAAACCTGCTGCTTGTGCTTTCAGCT  
GGTATCGTCGCCAGC

>Zmm3\_AC197699.3\_FG001

ATATCAATTAAGTAGAAAATGAGTTCATGGACTAAGATAATTTATAAAGAACTAGAATT  
CGTATTCCATATCGAGTGTAAAGATTAATAACATCATATAATTTTTTTCATTATATA  
GTATTGATGAATTAGTCGGTCCCCTTATATTGTAATCCTAGCTCCGCCCTTGCTCACAA  
TCACAAGAGTGTCTTCTGAGGCTGCCTTACCTAGCCCCATCCATAAGCCATCGACA  
CGTATCCCTACATCTCCTACGTCGTCTCCTGGCCTATATATGCTACACTGCACGGCGT  
GTGCTCTCTCTCCCTTTGCCCTACGATTGACTCGCAGCAGCGGCACGCGTGACGCGTG  
CGAGCGAGAGGACGGCGTCCAGAAAACAGCCGTGCCACGTGGGCCATCCCAGACCATG  
CAGGTACGTGCTCCAGTGGCCAGGGACCAATCACGTGCGCGCTGGCTGTGTTAACA  
AGTTAGCTGTGGGAGAAAGCAACAGTGTAGTGTAGAGAGAAAAGCACAGGAGACCTCCG  
TCGTCGCTGTGTTCTCTCTACGCAGGCCGATGGACAGGTGAACAGAGACCGGCCGGA  
AGGGGAGAGGACGGGAGAAAGAGAGAGACTTTCCTGTAAACAGACAGACTTGCGTTGC

GAGAGAGGAGACGGAGAGTCAGAGACCGAGAGAGGGACGATAGAAGGCATAGGAGCTAG  
GAGCGATGACC **GTAC**GCGCATATACTAGGAGCAGCAAATTAAGGCATATATAGGCAAA  
TAGTAGTAGTAGCGAAGCGAGTAGCGACGGGCGAGAGAGAAAGCAGTGCTACTGCTACG  
ACTACTCCTTAGCTCGTAGCCGTTATAAGGTGACGAGAGAGAGAGAAAGGGGAGA  
GAGATCTTGATCTAGTTCTAGTAGACTGCTAGCAGTGAACAGGCCCGGTAGAGGAGCTG  
AGGTAGCTGGGAAGGAGAAGGAAGGAATCGAAGAAAAAGGCAGCAAAGCAAGCAGGatg

>Zmm15 GRMZM2G53379

GATTGTCTATACGTGACATGACAACATCACAAACCAACTATAGACTACATATTACTCTA  
TCTATACTAAAATATAATTCATTTTTAACGCTAATTACATATTTATTAATTAACCTTATGA  
ATGTATTTTGTATGTATATCTACATTCATTATCTTCTATTTCGAATGTAGATAGAAAAAG  
AGCAATAGAACTATATTTTGGGACAGAAGAAGTATTAATTAGAGAGTATTTGGTTTCTA  
AAGACTTAGTCCCTCAATTTTATTCTTATTTCAGTCCCTAAATTGACAAATACAAAAACT  
GAAATTAAGTTTTAGATTTTTATATTTGACAATTTTATACTATAATAAAAATAGAGAGATT  
AAAAATTAATACCTAGAAATCAAATATACTCTTAAACTTCACTTCGTGCCAGAGGCTAG  
CTGCGACTAGCTGCGAGATTGGAATGGATCCGGTTTCGACC **GTAC**GAGGAAGGACGCTG  
GCCAGGCAGTGGGGCCTTGTGATGGGAGATGCGGTGGGGCCCGACGGGTCCGGCCGCG  
GGGCATCGGCTAATGGGAGTTCGACAACGGCAGCCTCGGAACCCATCCCGGTTTCGCGA  
TACCCCTCACTGCTCCAGTGCTCCCTCCTCCCCTCCCCTCCGATCAAGTCGGGGCAAC  
GCGCATCACTCGCTTTAAATCCGCACCTCCCGGCCGGTCCCCTTATCACCTCACCTTCT  
CCTTTGAGTCTCTCTCTCCGCCGCCGAGCTAGCTGTGACGTTATGCTCTCGCCGGCG  
CCATAGCGCCAGCGCCTACCGTCTACAACCTATCCAGCCTTAGGCTTACCTATCCCGTCA  
ATCAAGCCTCTCGTAAGGAACAAGGAAGGTAGCTAGCTAGTTCTATAGCTGCTGTGCTC  
GTCGTCATCGGCGGCGGCGGCCTGTTCTTAGAGGATAAGGTTGTCTAGCGGAGAGG  
GAGCTAGCCAGGATTTTCGGTTGAGATCAAGAGGGGGAGCAGGCCGGCGGCGGCGGCGatg

>Zmm19 GRMZM2G370777

CCCTGACCAAGCTGATGGAACCGGCGGGAGTAATGAATACAACAACCTGGCGCGAAGCA  
GCACGCACCGTGTTCACTGATGAAGCGAAGCGAGGGCAGATCTGCGCGAGATCCGGGGC  
GCCCGCCAATCCCCGGGGGCGGGGGCGGCGCGGACAGCGGTGCACCACAGAATCG  
GGGCCGGAACAGCGAATCCGGGCGGATGCAGCACAGCAGCA **GTAC**GCGCTACGCGGCCA  
ACCCAATCCAATCGAAGCGAAGGCGCAGCACACGGCATCTTCTCTTCCCTTCCCAG  
CTCCCACCCCGCCGGCTTTCTCCCTGATTTGTGATTTTCCCACAACGCCGCAGAGTGA  
GGCTGAGGCTACGGCAGGGCAGCCAGCAGAGAGCGCACCGTCACCGCGCACCAG  
CGGCCGCTGCTACAGGCT **GTAC**TGTTCTGGTCCGGCAGCACCCACCCGGCCACCCCTC  
ACTCGGTCACTCCGCAGTCCGCACTCTCCCTTTCCCTTTTCAGGAATCATCTACCTCGCC  
CGTTGGCACCATCCCTACGCTACGCCTCGTCTACTGCCTGCTGTGCTGTGCGTGG  
GTGGGCGGGCCCCGCGCGCCGTTCCGTGTGGCGAGGGGAGCATAAACAATGACTGACT  
GGGCCGGCCGGCCCCGTAGCCATTCGTCTGCCTTTCCCTCTCCAGTTTCCGTTTTTTT  
AATGCTTTGTTTACTCGCGGGGATCATGGGGTAATCGCGTGGGCCGTGCCTGGCTGGGT  
TTATTTATGCCGACCTGCCAATTGGAGCAAATCCCCTTTCCTGCCCTCCCCCTCCGCC  
TTTCCTCTCTCTCGCTCTCCTCCTCCTCCTCCTCCTCCTCCTCCTCCTCCTCCTTCCG  
TCCAACCGCCGGTTGGCTTTGCTGCTCCGAGCTCTTCCACACCCGCCCTCTCTCTTGT  
GGTCCGGCGGCGAGTGTCTGCGTCGTCACGGAGATCAGGGATCGGCCGGCGGGGatg

>ZmMADS2\_GRMZM2G316366

AGTATACATATAATGCCAATGCCAACATGTTTCAAGTGCTCTTAAAACTATGTACATT  
TTCTGCTTCGTTTACTCAAATACGTAAAATAGCACTGCTCTATAATAAGTACATCTATT  
ATCACCTATAAACTTTTTCCAGCAACATTTATATAATTTGTGCATCATTAATTTTAAC  
AACACTTATAAATTAGCTCAAATACGTAACAAAGCGCGCCCATGGGCGCGCTCAAGCTA  
CTAGTTCTTATACAGTGAAAACAATACTACTATATTAGACATAAAATTAGGTGTAGTTT  
ATTTATTTACTGTACTTCTTTAAGTCATAATTAGGTGTAGTAGAAGCTACTACGC  
CCTGACGGAGACAAGCACGCACAATAGAAAAGAGCGCCCTCGTGCTCAGAGTGCTCGCC  
TTTAGTTTCGTGGCTACTATATACTAGCTGCGACGATTTTTATTTTTCTTTCTTCTGG  
GCTATCATTAGCACGGCCATTTAGGGGTAATGAGCAGCGGCCAATAAACAAAGCCCTGG  
GGTAGCCAATCGGGTGTGCGCGTGCAGCGCGCGCGTCTGGCCTCCTGCCCTCCTCC  
TCCCTTTCTTGTCAAATAAAGCAAGTAGCAGATAGGGGAAAGTCTGCTCGCAAGTTGC  
ATCCGCCCTGCGCCAAGAAAAGCCATCGTTCTTCCCACAAACGCACACATAGAAGCATC  
ATTCCCCTCTCGGCTAGCTTCCCTCCTCTCTCCCTCCTTTCGTCTTCCCTTTCTTCT  
CCCTTGGGAAACCTGCTGCCTTTGAGCTTTCTTCTTCGAGTGCTCCCACCAGATCTCCT  
CCTCCTTACCTTCTTTGGCACGTTTCGGCGCGCGCGGAGATAGATAGATCCCGCCAT  
CGTCGTCGCCGTCCTTGCTTCCGATCGGAGGGCCACAACCACAACCTCTCGCTCCTTAG  
CGTGCGCGCGGAGCCAGGGTCAAGAAGAGAGCTAGCTATAGGCCGGAGATCGatg

>ZmMADS3\_GRMZM2G072582

ATGTTAGAAGCTCATTAGCCGATGAAGTGTAAACATCTCTAGTGTGAATACTTTATGGT  
GGAAAGTGTCTGTTGCTTTGTTGATTGTCACAGTTTGTGTCCCATGTAATTCTAACT  
CTAGCCATGGACTTTTTCTTCGGTCTATTAGCTTGAGTGCTATGTTAGGTTGCTACCA  
AGACAAAATACACTCACTTGTGAGTGTGAAGTTGGATTTTGTTCCTTTAGGGCTAGCT  
TGAAACTTAAATCCCCTCCAGAGTTTTTGGGGATTGAGTGAAAAATGAGCTATTTTCT  
ACTCAATCTTCGAGAATTATAGAGGGAAATTAAGTTTTTAAACTAGCCATTGTCTAAAA  
AATGTCATCTTCTTCCCCGTGCTAACTCGGCCATGTCGCTCGTGCTAGGGGAGGTTTCG  
ACTGTTGTAACACCCAAAATTTCTATTTTGAAGAATCAATTAATTTCTTTAAAAATATT  
TGAATTAATTCTTTTATGTGTATTATACTGCTAAAAATATCTTCTTCTTCTCGGCCGTA  
CAAGTAGGTCGCTTTCCAATATATATTCTCGTTTTACAATATTTTCAACGCATTTTTTC  
CTTTTATTAAGGTCCAAGTAATAAGTAGTAGTACGGTGGGGAAAGAGAAAGAGAGAGA  
AGCGCGGCCGAGCGAGCAGCGTTCGTCAGCGGTTGGGGCGCGGACGAGAGTGAGAGGCT  
GACGAGGTGGGCCCGTGCAGACCTTGACCAATCGGAGTTCGACAGCAGCCTGCCCCCAA  
ACCCACGCACGCTCATCACACAGACACACACTCTCTGTGTCTCTCGCGTCGCGCCCCG  
GCCGTGCGCTCCCCTCCCCTCCCTGCACCGACCGATCCCCTCCCCTGAACCCCTCCTCACA  
TCCTACCACCTCTTTAAAGCTACCCAGCTACCTGCCTGCCTCGCCTCAACCTCGCCGCG  
GGCCGCAGCCGCATAGACCGGAAGAGAAAGGAAGCAGAGATCGGAGGCAGGCGAAGatg

>ZmZAP1\_GRMZM2G148693

ATATTTACACTGCCGGTTCGTTAAGACGGGCCCGTCTGTTTTTTTCACTGGCGTGCTGT  
AACTGAAACCAGCCATTATAAATTTCTACGTGCCGCCACCTTAGAGCTCTTTTCTACTAG  
TGTTAACTTCTTTTCTTGTAGACCATTTGGAAAACAGGAAACAACCGCGTGTATTTC  
AACAAACAGATGGTTGTCCACACCTATGACAATCATGGCGTCAATGCAGTAGTAAGTTTG  
TCGTTTTTTGTGTGTGTGTGTTTATTAGCCGTTTCTTTGTTTTTTTTTCTTCTGTTGAGCT  
CCAACCTTTATGAAACGTCGTAAGCTGGTAATTATGAAATGTAAGGATTTGGAGAGAGAA  
AAAAACGGGAGGGAAAACCATGCATGCTGCTGACGCGACGGCCGGACGCAGACGCAAC

AATGCCCCCGGTGCGGCGTTGTCGAGCAGCCACTGCACCACCCACGCATCACCTGCAG  
TAATCTAGCGACGGGTTTTTCTTATTTATTTATTTATTTATTTATTTATTTTCTTCTCTCCC  
TCCCTCCCTCAGATTTGTTTTCGTTTTTCATTAATCGTTATTACCAGCAATTAATTA  
TTATCTATTGATTTACCAAACCGCAATAAAGAATATATATATATTCTTTTATTAAGGTCCA  
GTAATAAGCAGCACAGAAGCGCAGGTGCAGCAGCAGCAGCGTCAGCGCCCGAGGCGCGC  
ACGAGAGAAACAGAGGCTGACGAGGTGGGGCCCGTGCGGGCCTTGACCAATCGGAGTTC  
GACAACAGCCTGGCCACCCACAAACACACACTCCTTCGCCTCGCGCCGGCCGTCGTTCG  
CTCCCTCCACCGAACGATCCCTCCTCCTCCTCCTCCTCCTCCTCCTCCTCGCATCCCACCC  
ACCCACCTTCTCCTTAAAGCTACCTGCCTACCCGGCGGTTGCGCGCCGCAATCGATCG  
ACCGGAAGAGAAAGAGCAGCTAGCTAGCTAGCAGATCGGAGCACGGCAACAAGGCGatg
