# Supplementary material
Source: PubMed Central journal article supplement (PMC5629337)
Supplement: 755TableS1.pdf [file 755TableS1.pdf]

**Table S1A: Primers for Expression Analysis**

| Primer Name | Sequence                 |
|-------------|--------------------------|
| ZmActin-F   | CCAAGGCCAACAGAGAGAAA     |
| ZmActin-R   | CCAAACGGAGAATAGCATGAG    |
| Tb1-F       | CCAAGAAAATCGGCCAATAA     |
| Tb1-R       | AACACCTCTCCCTCTCCTCC     |
| Tga1-F      | CAGTGCAGCAGGTTCCATC      |
| Tga1-R      | GAAGCTTATCTCGCCCTCCT     |
| PCNA2-F     | ATGTTGGAGTTGCGTCTGGT     |
| PCNA2-R     | GATGGTGATGATGTCTCCTCGTT  |
| PRL-F       | AAGAGTGATTTCCTTCCGTTC    |
| PRL-R       | GATATTGCATCAAGGCCAGAC    |
| Zag1-F      | ACTTAAGGAGCCGGGTTGAT     |
| Zag1-R      | ATCTTCCACCTTGGTCTGTTG    |
| Zag2-F      | CCATGTAACTGATCTCCGCA     |
| Zag2-R      | TGTCAAGGCTACTGTTGAGAGGT  |
| Zmm3-F      | AAGCGCAAGGAACAACAAC      |
| Zmm3-R      | ACCCTATATGCAGCGAAGGA     |
| Zmm15-F     | TGGGAGAGGATCTTGAAACG     |
| Zmm15-R     | GAAGCACGAGGAAGACGAAC     |
| Zmm19-F     | AACAAGATGGTCTGTGTTGATCTG |
| Zmm19-R     | GCATGCTTGAGCACAGCTTA     |
| ZmMADS2-F   | AGAAGTGCAGTCCCTGGAGA     |
| ZmMADS2-R   | TGCAAAGTTGAATGGAGTCG     |
| ZmMADS3-F   | CGTGAATCTAGCGGTGCTTT     |
| ZmMADS3-R   | CCCTCATTCAACCCCTACAC     |
| ZmZAP1-F    | GATCATTGCTCCCTGTTGGT     |
| ZmZAP1-R    | CAGCAAGTCACGAACCATGT     |

**Table S1B: Primers for ChIP Analysis**

| Primer Name    | Sequence                | Notes  |
|----------------|-------------------------|--------|
| ZmActin-F      | CCAAGGCCAACAGAGAGAAA    | qPCR   |
| ZmActin-R      | CCAAACGGAGAATAGCATGAG   | qPCR   |
| PCNA2 ChIP-F   | TTGTGCTGAGCAGCAGAGAT    | RT-PCR |
| PCNA2 ChIP-R   | TGTGGATGGGAAGAGGAAAAC   | RT-PCR |
| Tga1 ChIP-F    | ACAGGTGCACAGCACAACAT    | RT-PCR |
| Tga1 ChIP-R    | AGCAGCAGCCAACAAAGATT    | RT-PCR |
| PCNA2 ChIP-F   | GACAGGTGGGTCCAATCCTTAAC | qPCR   |
| PCNA2 ChIP-R   | GGAGATTAATAGGGAGGCGTTTG | qPCR   |
| Tga1 ChIP-F    | ACAGGTGCACAGCACAACAT    | qPCR   |
| Tga1 ChIP-R    | AGGAGCGTGTGCATGAAAAG    | qPCR   |
| Zag1 ChIP-F    | CCCTGTACAGTCCACACG      | qPCR   |
| Zag1 ChIP-R    | GTGGGGATAAGAAGGGTGGT    | qPCR   |
| Zag2 ChIP-F    | CTGCCTGCCAGCTTCTTCT     | qPCR   |
| Zag2 ChIP-R    | TATATGTGCGACTGCGTGCT    | qPCR   |
| Zmm3 ChIP-F    | GGAGAGGACGGGAGAAAGAG    | qPCR   |
| Zmm3 ChIP-R    | TAACCGGCTACGAGCTAAGG    | qPCR   |
| Zmm15 ChIP-F   | CACTTCGTGCCAGAGGCTA     | qPCR   |
| Zmm15 ChIP-R   | GCGGATTTAAAGCGAGTGAT    | qPCR   |
| Zmm19 ChIP-F   | GGCTTTCTCCCTGATTGTG     | qPCR   |
| Zmm19 ChIP-R   | GGCGAGGTAGATGATTCCTG    | qPCR   |
| ZmMADS2 ChIP-F | GCGCGCTCAAGCTACTAGTTC   | qPCR   |
| ZmMADS2 ChIP-R | ACGAAACTAAAGGCGAGCACT   | qPCR   |
| ZmMADS3 ChIP-F | GGGGAGGTTGCGACTGTTGTA   | qPCR   |
| ZmMADS3 ChIP-R | TCTCTTTCCCCACCGTACT     | qPCR   |
| ZmZAP1 ChIP-F  | CACTGCCGGTTCGTTAAGAC    | qPCR   |
| ZmZAP1 ChIP-R  | TACTGCATTGACGCCATGAT    | qPCR   |
